# Supplementary material for: Benefits of local consolidative treatment in oligometastases of solid cancers: a stepwise-hierarchical pooled analysis and systematic review
Source: PubMed Central journal article supplement (PMC7820397; doi:10.1038/s41698-020-00141-4), 2021-01-21
Supplement: 41698_2020_141_MOESM1_ESM.pdf [file 41698_2020_141_MOESM1_ESM.pdf]

## **Supplementary Note 1. Draft of search strategy**

**Search term:** (oligometastasis OR oligometastases OR oligometastatic OR “limited metastatic” OR “limited metastasis” OR “limited metastases”) AND survival AND (randomised OR randomized OR versus OR comparison OR compare OR controlled)

### **Search strategy in Embase and Medline**

Embase search:

#1 ('oligometastasis'/exp OR oligometastasis OR oligometastases OR oligometastatic OR 'limited metastatic' OR 'limited metastasis' OR 'limited metastases') AND ('survival'/exp OR survival) AND (randomised OR randomized OR versus OR 'comparison'/exp OR comparison OR compare OR controlled)

#2 ('oligometastasis'/exp OR oligometastasis OR oligometastases OR oligometastatic OR 'limited metastatic' OR 'limited metastasis' OR 'limited metastases') AND ('survival'/exp OR survival) AND (randomised OR randomized OR versus OR 'comparison'/exp OR comparison OR compare OR controlled) AND ('article'/it OR 'article in press'/it)

#3 ('oligometastasis'/exp OR oligometastasis OR oligometastases OR oligometastatic OR 'limited metastatic' OR 'limited metastasis' OR 'limited metastases') AND ('survival'/exp OR survival) AND (randomised OR randomized OR versus OR 'comparison'/exp OR comparison OR compare OR controlled) AND ('article'/it OR 'article in press'/it) NOT ('animal cell'/de OR 'animal model'/de OR 'animal tissue'/de OR 'case report'/de OR 'ex vivo study'/de OR 'human cell'/de OR 'human tissue'/de OR 'in vitro study'/de OR 'in vivo study'/de OR 'meta analysis'/de OR 'nonhuman'/de OR 'systematic review'/de)

\*#1 is our basic strategy using Emtree; #2 is to filter studies with irrelevant formats (e.g. reviews, editorials, letters, conference abstracts); #3 is to filter studies which is not relevant clinical studies (e.g. case reports, in vivo studies, systematic reviews)

### **Search strategy in Pubmed and Cochrane library**

Using search query, filters to include clinical trial (I-IV), comparative study, clinical study, controlled clinical trial, multicenter study, and observational study were used. We did not use any filter in Cochrane library..

**Supplementary table 1. General information from the included studies**

| Author, target disease  | Affiliation                                                                         | Publication | Patient recruit | Study type | LCT group compared to control                                                   | Total No. of patients | NOS score | Type of oligometastases; Preceding Tx. For primary dz. | Defined No. of oligomets.                       | Conflicts of interest |
|-------------------------|-------------------------------------------------------------------------------------|-------------|-----------------|------------|---------------------------------------------------------------------------------|-----------------------|-----------|--------------------------------------------------------|-------------------------------------------------|-----------------------|
|                         |                                                                                     |             |                 |            |                                                                                 |                       |           |                                                        |                                                 |                       |
| He, NSCLC               | Sun Yat-sen University, China.                                                      | 2017        | 2003–2013       | R          | N/A                                                                             | 21                    | 7         | Synchronous and metachronous; OP                       | ≤3, in lung                                     | None                  |
| Iyengar, NSCLC          | University of Texas Southwestern, US                                                | 2017        | 2014–2016       | P          | RCT                                                                             | 29                    | 9         | Synchronous; PR or SD after CTx.                       | Up to 6 lesions (including primary) in 3 organs | None                  |
| Sheu, NSCLC             | MDACC, US                                                                           | 2014        | 1998–2012       | R          | PSM, balanced except higher age                                                 | 74                    | 9         | Synchronous; no PD after CTx.                          | ≤3                                              | None                  |
| Yano, NSCLC             | Kyushu University, Japan                                                            | 2010        | 1994–2004       | R          | N/A                                                                             | 93                    | 7         | Metachronous; surgery                                  | Controllable with surgery or RTx                | None                  |
| Frost, NSCLC            | Charité, Evangelische Lungenklinik, DRK Klinikum Berlin-Mitte, Germany.             | 2018        | 2000–2016       | R          | PSM                                                                             | 180                   | 9         | Synchronous                                            | 1–4 in one organ                                | None                  |
| Gomez, NSCLC            | MDACC, London health center, University of Colorado, US & UK                        | 2019        | 2012–2016       | P          | RCT                                                                             | 49                    | 9         | Synchronous and metachronous; CTx.                     | ≤3                                              | None                  |
| Gray, NSCLC             | Harvard Medical School, US                                                          | 2014        | 2000–2011       | R          | younger age (p=0.027)                                                           | 66                    | 7         | Synchronous                                            | ≤4, brain only                                  | Industrial            |
| Hu, NSCLC               | Shanghai Jiaotong University, China.                                                | 2019        | 2010–2016       | R          | more brain mets, less lung mets. (P<0.001)                                      | 231                   | 8         | Synchronous; TKI                                       | ≤5 in single organ                              | None                  |
| Song, NSCLC             | Cancer Hospital of China Medical University, Liaoning Cancer Hospital and Institute | 2020        | 2005–2019       | R          | PSM, more peripheral location of mets. (p=0.048)                                | 70                    | 9         | Synchronous                                            | ≤5                                              | None                  |
| Xu Q, NSCLC             | Tongji University, China                                                            | 2018        | 2010–2016       | R          | Lower T and N stage                                                             | 90                    | 7         | Synchronous; PR or SD after TKI                        | ≤5                                              | None                  |
| Ni, NSCLC               | Shandong First Medical University, China.                                           | 2020        | 2015–2018       | R          | no significant difference                                                       | 86                    | 8         | Synchronous                                            | ≤5                                              | None                  |
| Shang, NSCLC (postop)   | Shandong University, China.                                                         | 2019        | 2005–2016       | R          | no significant difference except mets. location                                 | 152                   | 8         | Synchronous                                            | ≤5                                              | None                  |
| Gore, SCLC (extended)   | 57 centers                                                                          | 2017        | 2010–2015       | P          | RCT, more old age in control, p=0.03)                                           | 86                    | 9         | Synchronous; PR or CR after CTx.                       | ≤4                                              | Industrial            |
| Xu SCLC (extended)      | Tianjin Medical University, China                                                   | 2017        | 2010–2015       | R          | PSM, more weight loss patient                                                   | 44                    | 9         | Synchronous                                            | in one organ or in single RT portal             | None                  |
| Bouman-Wammes, prostate | VUMC, Netherland                                                                    | 2017        | 2009–2015       | R          | higher PSA at Dx. (p=0.015), more single mets (p=0.003)                         | 63                    | 7         | Metachronous; prostatectomy or RTx.                    | ≤3                                              | Industrial            |
| Lan, prostate           | Lanzhou General Hospital of Lanzhou Command, China.                                 | 2019        | 2005–2016       | R          | lower PSA (p=0.003), cT (p<0.001), N stage (p=0.015), fewer bone mets (p=0.019) | 111                   | 7         | Synchronous                                            | ≤5                                              | None                  |

|                       |                                                                 |      |           |   |                                                                                              |     |   |                                                       |                                 |                           |
|-----------------------|-----------------------------------------------------------------|------|-----------|---|----------------------------------------------------------------------------------------------|-----|---|-------------------------------------------------------|---------------------------------|---------------------------|
| Ost, prostate         | Six institutions in Belgium                                     | 2018 | 2012–2015 | P | RCT                                                                                          | 62  | 9 | Metachronous; OP, RTx.                                | ≤3                              | Industrial                |
| Steuber, prostate     | Six European and one US center                                  | 2019 | 1993–2014 | R | PSM                                                                                          | 659 | 9 | Metachronous; OP & adjuvant RTx (biochemical failure) | ≤5                              | None                      |
| Parker, prostate      | 117 centers in UK and Swiss                                     | 2018 | 2013–2016 | P | RCT                                                                                          | 819 | 9 | Synchronous                                           | ≤3 (low burden subgroup)        | Industrial and government |
| Tsumura, prostate     | Kitasato University, Japan.                                     | 2019 | 2003–2013 | R | N/A                                                                                          | 40  | 7 | Synchronous                                           | ≤5                              | None                      |
| Giessen, colorectal   | 48 German centers                                               | 2013 | 2000–2004 | P | more N-, better PS                                                                           | 253 | 7 | Synchronous and metachronous; OP (95%)                | 1 (~95% of patients)            | Industrial                |
| Ruers, colorectal     | 22 European centers                                             | 2017 | 2002–2007 | P | RCT                                                                                          | 119 | 9 | Synchronous and metachronous                          | ≤9, all resectable or ablatable | None                      |
| Ruo, colorectal       | Memorial Sloan Kettering Cancer Center, US                      | 2003 | 1996–1999 | R | more comorbidity (p=0.04), more liver only and single mets. (p=0.02)                         | 230 | 7 | Synchronous                                           | ≤3                              | None                      |
| Palma, multiple       | 10 institutions in Canada, Netherlands, Scotland, and Australia | 2019 | 2012–2016 | P | RCT                                                                                          | 99  | 9 | Metachronous; no progression after definitive Tx.     | ≤5                              | Industrial                |
| Chen Y, esophagus     | Wuhan, Zengzhou Univ, China                                     | 2019 | 2012–2015 | R | no significant difference                                                                    | 461 | 8 | Synchronous                                           | ≤3                              | None                      |
| Depypere, esophagus   | University Hospitals Leuven, Belgium                            | 2018 | 2002–2015 | R | N/A                                                                                          | 20  | 7 | Synchronous or metachronous; NAC(R)T                  | 3–5 mets in single organ        | None                      |
| Chen J, HCC           | Sun Yat-sen University Cancer Center, China.                    | 2018 | 2013–2016 | R | PSM                                                                                          | 68  | 9 | Synchronous                                           | ≤5 in lung                      | None                      |
| Pan, HCC              | Sun Yat-sen University Cancer Center, China.                    | 2017 | 2004–2013 | R | PSM                                                                                          | 92  | 9 | Synchronous                                           | N/A                             | None                      |
| Morino, bile duct     | Kyoto University, Japan.                                        | 2020 | 1996–2015 | R | PSM, more ICC (p<0.001), more local mets. location (p=0.005)                                 | 67  | 8 | Metachronous; R0 or R1 resection                      | ≤3                              | None                      |
| Schulz, head and neck | Klinikum rechts der Isar, Germany.                              | 2018 | 2001–2016 | R | intentioned match                                                                            | 47  | 7 | Synchronous and metachronous; OP, CTx., RT            | 1 (77%), but ranged up to 10    | None                      |
| Falk, sarcoma         | 15 centers, France                                              | 2015 | 2000–2012 | R | smaller primary tumor (p=0.04), more controlled primary (p=0.0003), less lung mets (p=0.006) | 281 | 7 | Synchronous and metachronous; OP 93%, R0 62% R1 23%   | ≤5                              | Industrial                |

Abbreviations: NOS, Newcastle-Ottawa scale; NSCLC, non-small cell lung cancer; SCLC, small cell lung cancer; HCC, hepatocellular carcinoma; R, retrospective; N/A, not assessable; OP, operation; P, prospective; RCT, randomized controlled trial; PR, partial remission; SD, stable disease; CTx., chemotherapy; PSM, propensity score matching; TKI, tyrosine kinase inhibitor; PSA, prostate-specific antigen; RTx, radiotherapy; PS, performance status; NACT, neoadjuvant chemotherapy; NAC(R)T, neoadjuvant chemotherapy and/or radiotherapy

**Supplementary table 2. Clinical information of included studies**

| Author, target disease | n   | No. of oligometas.                | Site                                         | Target of LCT  | Modality of LCT                            | n  | No. of oligometas.                | Site                                | Control               | Median FU | OS (LCT arm vs. control arm) |                           |        | PFS (LCT arm vs. control arm) |                            |        |
|------------------------|-----|-----------------------------------|----------------------------------------------|----------------|--------------------------------------------|----|-----------------------------------|-------------------------------------|-----------------------|-----------|------------------------------|---------------------------|--------|-------------------------------|----------------------------|--------|
|                        |     |                                   |                                              |                |                                            |    |                                   |                                     |                       |           | Median (months)              | 1/2 year rate             | p      | Median (months)               | 1/2 year rate              | p      |
|                        |     |                                   | LCT arm                                      |                |                                            |    |                                   | Control arm                         |                       |           |                              |                           |        |                               |                            |        |
| He, NSCLC              | 11  | 1 (60%);<br>2 (40%)               | Lung 100%                                    | M              | resection of mets. and/or CTx.             | 10 | N/A                               | Lung 100%                           | CTx.                  | 37.5      | 37 vs. 11.6                  | 100/70% vs. 80/40%        | 0.026  |                               |                            |        |
| Iyengar, NSCLC         | 14  | 2 (50%);<br>3-4 (28.6%)           | Lung or mediastinum >70%                     | M              | SBRT & CTx.                                | 15 | 2 (40%);<br>3-4(33%)              | Lung or mediastinum >70%            | CTx.                  | 9.6       | not reached                  |                           |        | 9.7 vs. 3.5                   | 1yr: 35.7% vs 13.3%        | 0.01   |
| Sheu, NSCLC            | 60  | mean 1.28                         | Brain ~50%                                   | M and P        | conventional RTx. (76%)                    | 14 | mean 1.23                         | Brain (~50%)                        | CTx.                  |           |                              | 83.3/58.3 vs. 35.7/0%     | <0.01  |                               | 1yr: 46.7% vs. 18.2%       | <0.01  |
| Yano, NSCLC            | 44  |                                   |                                              | M (recurrence) | surgery or RTx. And/or CTx.                | 49 |                                   |                                     | CTx. or SOC           | ~4 year   | 74 vs 10.9                   | 77.3/61.4% vs. 46.9/24.5% | <0.05  |                               |                            |        |
| Frost, NSCLC           | 90  | 1 (85%);<br>2 (8%)                | Brain 57%;<br>bone 10%;<br>lung 9%           | M and/or P     | Lobectomy, CCRT, SBRT; 79% received CTx.   | 90 | 1 (76%);<br>2 (14%)               | Brain 32%;<br>bone 22%;<br>lung 21% | CTx. (96%)            | 32 vs. 19 | 60.4 vs 22.5                 | 92.2/76 vs. 81.9/45.9%    | <0.001 | 25.1 vs. 8.2                  | 67.8/52.2 % vs. 31/8.9%    | <0.001 |
| Gomez, NSCLC           | 25  | 0-1 (68%);<br>2-3 (32%)           | Brain 28%;<br>other 72%                      | M and/or P     | RTx. or surgery & standard maintenance     | 24 | 0-1 (62%);<br>2-3 (38%)           | Brain 25%;<br>other 75%             | Standard maintenance  | 38.8      | 41.2 vs. 17                  | 84/68% vs. 62.5/45.8%     | 0.017  | 14.2 vs. 4.4                  | 52/28% vs. 20.8/12.5 %     | 0.022  |
| Gray, NSCLC            | 38  | 1 (50%);<br>2-4 (50%)             | Brain 100%                                   | P              | Thoracic surgery of RTx., brain RTx. & CTx | 28 | 1 (50%);<br>2-4 (50%)             | Brain 100%                          | CTx and/or Brain RTx. |           | 26.4 vs. 10.5                | 71/54% vs. 46/26%         | <0.001 |                               |                            |        |
| Hu, NSCLC              | 143 | 1-3 (81%);<br>4-5 (19%)           | Brain 44%;<br>Bone 35%                       | M              | surgery and/or radiotherapy & TKI          | 88 | 1-3 (83%);<br>4-5 (17%)           | Bone 42%;<br>lung 33%               | CTx. (TKI)            | 24        | 34 vs. 21                    | 95.3/72.1% vs. 84.1/40.9% | 0.001  | 15 vs 10                      | 60.7/18.6 % vs 33.3/10.8 % | <0.001 |
| Song, NSCLC            | 35  | 1 (46%);<br>2 (29%);<br>3-5 (26%) | Lung 57%;<br>bone 40%;<br>liver 30%          | M and/or P     | surgery or RTx. and CTx.                   | 35 | 1 (23%);<br>2 (40%);<br>3-5 (37%) | Lung 60%;<br>bone 54%               | CTx.                  |           |                              | 51.4/28.6% vs. 31.4/5.7%  | 0.002  |                               |                            |        |
| Xu Q, NSCLC            | 51  | 1 (49%);<br>2-3 (51%)             |                                              | P and/or M     | surgery or RTx. After TKI.                 | 39 | 1 (41%);<br>2-3 (51.3%)           |                                     | CTx. (TKI)            | 38        | 40.9 vs. 30.8                | 96.1/86.3% vs. 94.9/71.8% | <0.001 | 20.6 vs. 13.9                 | 86.3/25.6 % vs. 70.5/0%    | <0.001 |
| Ni, NSCLC              | 34  | 1-3 (85%);<br>4-5(15%)            | Lung 40%;<br>liver 23%;<br>adrenal gland 16% | M and/or P     | TKI & MWA                                  | 52 | 1-3 (89%);<br>4-5 (11%)           | Lung (32%);<br>bone                 | CTx. (TKI)            | 36        | 34.8 vs. 22.7                | 94.1/67.6% vs. 90.3/46.2% | 0.04   | 16.7 vs. 12.9                 | 88.2/23.5 % vs. 61.5/0%    | 0.02   |

|                         |     |                                       |                                              |               |                                               |     |                                       |                                           |                           |              |                  |                                                                                          |               |                                  |                                      |        |
|-------------------------|-----|---------------------------------------|----------------------------------------------|---------------|-----------------------------------------------|-----|---------------------------------------|-------------------------------------------|---------------------------|--------------|------------------|------------------------------------------------------------------------------------------|---------------|----------------------------------|--------------------------------------|--------|
|                         |     |                                       |                                              |               |                                               |     |                                       | (23%);<br>liver (20%)                     |                           |              |                  |                                                                                          |               |                                  |                                      |        |
| Shang, NSCLC (postop)   | 105 | 1 (73%);<br>2-5 (27%)                 | LN 46%;<br>brain 24%;<br>lung 19%            | M and/or<br>P | RTx. or RFA and/or<br>CTx.                    | 47  | 1 (72%);<br>2-5 (28%)                 | LN (72%)<br>lung (32%)                    | CTx. or<br>BSC            | 19           | 19 vs. 20        | 1yr: 72.4 vs<br>72.3%                                                                    | 0.519         | 10 vs. 7                         | 1yr: 40.9<br>vs. 29.8%               | 0.006  |
| Gore, SCLC (extended)   | 44  | 1 (32%);<br>2-4 (68%)                 | Adrenal 25%;<br>distant LN 23%;<br>liver 23% | P             | PCI and CRTx.                                 | 42  | 1 (41%);<br>2-4 (60%)                 | Distant LN 31%;<br>Bone 26%;<br>Liver 24% | PCI                       | 9            | 13.8 vs.<br>15.8 | 1yr: 50.8 vs.<br>60.1%                                                                   | 0.21          | 4.9 vs.<br>2.9                   | 1yr: 23.9<br>vs. 20.5%               | 0.01   |
| Xu SCLC (extended)      | 22  |                                       |                                              | M and/or<br>P | CTx and RTx                                   | 22  |                                       |                                           | CTx.                      | 36.4         |                  | 72.7/25.2 vs.<br>18.2/12.7%                                                              | 0.002         |                                  | 40.9/19.3<br>vs.<br>9.1/4.8%         | 0.006  |
| Bouman-Wammes, prostate | 43  | 1 (81%);<br>2 (14%)                   | LN 77%;<br>bone 21%                          | M             | SBRT                                          | 20  | 1 (45%);<br>2 (40%)                   | LN 65%;<br>Bone 35%                       | Active surveillance       |              |                  |                                                                                          |               | 17.3 vs<br>4.2                   | 72.1/35.8<br>% vs.<br>22.6/0%        | <0.001 |
| Lan, prostate           | 35  | 1 (26%)<br>2 (37%)<br>3 (20%)         | Bone 100%                                    | P             | Prostatectomy & ADT                           | 76  | 1(8%)<br>2(32%)<br>3(30%)             | Bone 100%                                 | ADT                       | 35           |                  | CSS 3/5yr:<br>90.8/63.6%<br>vs.<br>87.9/74.9%                                            | 0.773         | (PSA-RFS)<br>32 vs.<br>17        | 82.8/62.8<br>% vs.<br>65.8/38.2<br>% | 0.184  |
| Ost, prostate           | 31  | 1 (58%);<br>2(19%);<br>3(22%)         | LN 55%;<br>non-nodal 45%                     | M             | SBRT(81%) or<br>resection                     | 31  | 1 (29%);<br>2 (32%);<br>3(39%)        | LN 55%;<br>non-nodal 45%                  | Active surveillance       | 3 year       |                  |                                                                                          |               | (ADT-free survival)<br>21 vs. 13 | 70.9/45.2%<br>vs.<br>64.5/32.3%      | 0.11   |
| Steuber, prostate       | 165 |                                       | Pelvic LN ~90%                               | M             | PLND or and ADT                               | 494 |                                       | Pelvic LN ~90%                            | ADT                       |              |                  | CSS 5/10 yr:<br>98.6/95.6 vs.<br>95.7/84.8%<br>OS 3/5 yr:<br>99.2/98.7 vs.<br>98.2/95.4% | 0.03;<br>0.23 |                                  |                                      |        |
| Parker, prostate        | 410 |                                       | Bone 76%;<br>distant LN 36%                  | P             | RT and ADT                                    | 409 |                                       | Bone 76%;<br>distant LN 34%               | ADT                       | 37           |                  | 1/2/3 yr:<br>98.8/92.5/82.6<br>% vs.<br>96.7/87.7/74.8<br>%                              | 0.007         |                                  | 89.6/72.8<br>% vs.<br>86.3/69.3<br>% | 0.033  |
| Tsumura, prostate       | 22  |                                       | Bone or pelvic LN                            | M             | metastatic RTx.,<br>prostate brachy &<br>HTx. | 18  |                                       | Bone or pelvic LN                         | prostate brachy &<br>HTx. | 62.5         |                  |                                                                                          |               |                                  | 94.4/88.9%<br>vs.<br>95.5/73.3%      | 0.027  |
| Giessen, colorectal     | 38  | 1 (95%)                               | Liver 100%                                   | M             | Hepatic resection and<br>CTx.                 | 215 | 1 (100%)                              | Liver 100%                                | CTx.                      |              | 48.0 vs.<br>17.0 | 97.4/89.5%<br>vs. 68/37.6%                                                               | <0.001        | 16.6 vs.<br>6.5                  | 63.2/36.8<br>% vs.<br>21.2/5.2%      | <0.001 |
| Ruer, colorectal        | 60  | 1-3 (48%);<br>4-6 (30%);<br>7-9 (22%) | Liver 100%                                   | M             | RFA, surgery and/or<br>CTx.                   | 59  | 1-3 (31%);<br>4-6 (46%);<br>7-9 (24%) | Liver 100%                                | CTx.                      | 9.7<br>years | 45.6 vs<br>40.5  | 91.7/75% vs.<br>89.8/74.5%                                                               | 0.01          | 16.8 vs.<br>9.9                  | 58.3/35%<br>vs.<br>40.7/20.3<br>%    | 0.005  |

|                       |     |                              |                                   |                |                                     |     |                               |                                     |                  |            |               |                              |         |                  |                              |       |
|-----------------------|-----|------------------------------|-----------------------------------|----------------|-------------------------------------|-----|-------------------------------|-------------------------------------|------------------|------------|---------------|------------------------------|---------|------------------|------------------------------|-------|
| Ruo, colorectal       | 127 | 1 (68%);<br>2(26%);<br>3(6%) | Liver 56%                         | P              | bowel surgery and CTx.              | 103 | 1 (53%);<br>2(30%);<br>3(17%) | Liver 41%                           | CTx. (83.5%)     |            | 16 vs. 9      | 63.8/25% vs.<br>35.9/6%      | <0.001  |                  |                              |       |
| Palma, multiple       | 66  | 1(46%);<br>2(29%);<br>3(18%) | lung 43%;<br>bone 35%             | M              | SBRT and/or standard CTx.           | 33  | 1 (36%);<br>2(40%);<br>3(18%) | Lung 53%;<br>bone 31%               | CTx.             | 26 vs. 25  | 41 vs. 28     | 84.3/69.7% vs.<br>87.4/60.6% | 0.09    | 12 vs. 6         | 54.5/36.4% vs.<br>22.7/15.2% | 0.001 |
| Chen Y, esophagus     | 196 |                              |                                   | M and P        | CCRT                                | 265 |                               |                                     | CTx              | 11.5       | 16.8 vs 14.8  | 72.8/27.2% vs.<br>63.5/17.5% | 0.056   | 8.7 vs. 7.3      | 27.6/4.7% vs.<br>21.9/0.9%   | 0.002 |
| Depypere, esophagus   | 10  |                              | Lung 50%;<br>adrenal 20%          | P              | esophagectomy +/- lung metastectomy | 10  |                               | Liver 50%;<br>brain 30%             | CTx.             |            | 21.4 vs 12.1  | 80/40% vs.<br>50/10%         | 0.042   |                  |                              |       |
| Chen J, HCC           | 34  |                              | Lung 100%                         | M and/or P     | TACE, RFA, resection & sorafenib    | 34  |                               | Lung 100%                           | Sorafenib        | 8.4        | 18.4 vs. 7.4  | 67.6/47% vs.<br>35.3/23.5%   | 0.015   | TTP: 3.1 vs. 2.3 | (TTP) 11.8/0% vs. 0/0%       | 0.009 |
| Pan, HCC              | 46  | Mean 2.22 +/- 1.35           | LN 100%                           | M (lymph node) | RFA; and BSC or sorafenib           | 46  | Mean 2.74 +/- 1.37            | LN 100%                             | BSC or sorafenib | 14 vs 13.8 | 13 vs. 7.8    | 58.3%/11.7% vs.<br>17.9/0%   | 0.001   |                  |                              |       |
| Morino, bile duct     | 33  | Median 1 (1-3)               | Liver 39%;<br>LN 27%;<br>lung 12% | M (recurrence) | Surgery, RT, RFA, TACE and/or CTx.  | 34  | Median 1 (1-3)                | Local 35.3%; liver 29%;<br>LN 20.5% | CTx. or BSC      | 12.6       | 48.6 vs. 14.2 | 97/84.8% vs.<br>64.7/20.5%   | <0.001  |                  |                              |       |
| Schulz, head and neck | 37  | 1 (70%);<br>2-3 (16%)        | Lung 59%;<br>bone 22%             | M              | RTx. or resection and/or CTx.       | 10  | 1 (100%)                      | Lung 90%                            | CTx. or BSC      |            | 24 vs. 7      | 67.6%/51.3% vs.<br>20%/10%   | NA      |                  |                              |       |
| Falk, sarcoma         | 164 |                              | Lung 51%;<br>liver 7%             | M              | RTx., RFA, OP +/- CTx.              | 117 |                               | Lung 69%;<br>liver 7%               | CTx. in majority | 25.7       |               | 79.6/63.6% vs.<br>52.3/36.3% | <0.0001 |                  |                              |       |

Abbreviations: LCT, local consolidation therapy; OS, overall survival; PFS, progression free survival; CTx., chemotherapy; M, metastases; P, primary disease; NSCLC, non-small cell lung cancer; RTx., radiotherapy; CCRT, concurrent chemoradiotherapy; SBRT, stereotactic body radiotherapy; ATT, aggressive thoracic therapy; TKI, tyrosine kinase inhibitor; MWA, microwave ablation; SCLC, small cell lung cancer; RFA, radiofrequency ablation; LN, lymph node; BSC, best supportive care; PCI, prophylactic cranial irradiation; ADT, androgen deprivation therapy; PLND, pelvic lymph node dissection; IMRT, intensity modulated radiotherapy; TACE, transarterial chemoradiotherapy; TTP, time to progression; OP, operation
